# Supplementary material for: Identification of Multipotent Stem Cells in Human Brain Tissue Following Stroke
Source: PubMed Central journal article supplement — Stem Cells Dev. 2017 Jun 1;26(11):787–97. doi: 10.1089/scd.2016.0334 (PMC5466056; doi:10.1089/scd.2016.0334), 2017-06-01
Supplement: Supp_Figure1.pdf [file Supp_Figure1.pdf]

## Supplementary Data

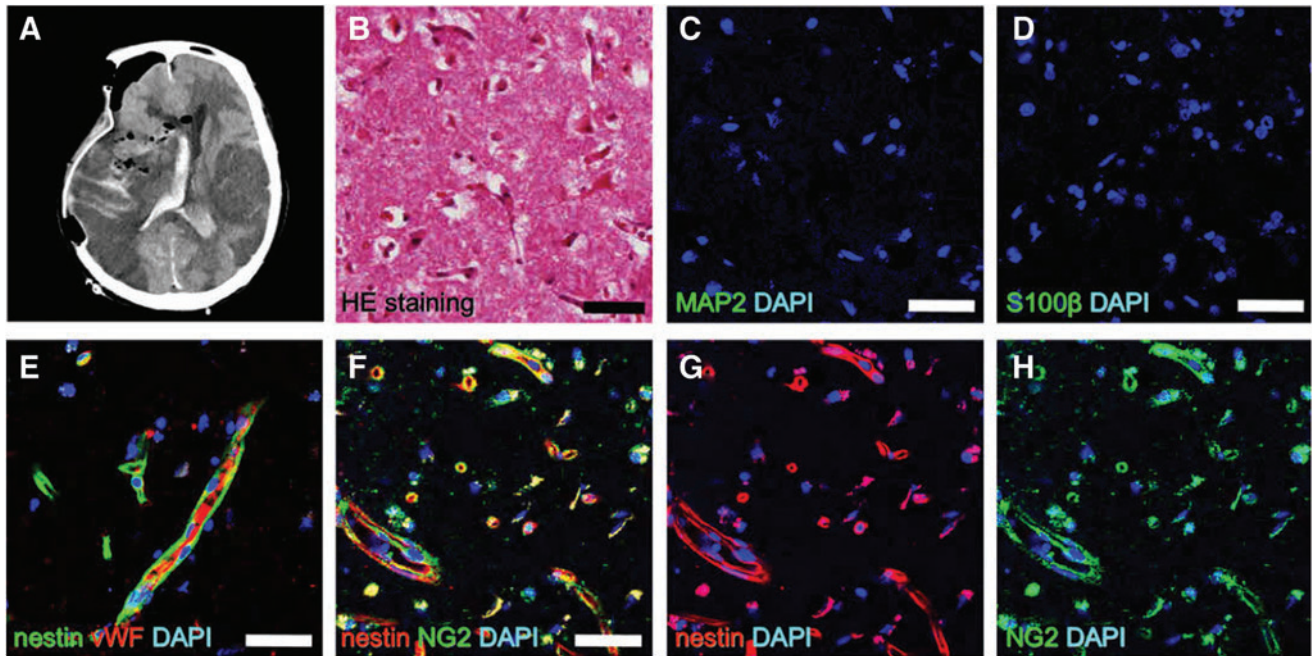

**SUPPLEMENTARY FIG. S1.** CT image and histological findings of poststroke human brain tissue sections obtained from the second patient. Postoperative CT following decompressive craniectomy and partial lobectomy (A). H&E staining of surgically excised tissue (B). MAP2<sup>+</sup> neurons [MAP2 (C: green) and DAPI (C: blue)] and S100β<sup>+</sup> astrocytes [S100β (D: green) and DAPI (D: blue)] were rarely observed. However, immunohistochemical analysis confirmed that nestin<sup>+</sup> cells were localized near vWF<sup>+</sup> ECs within these regions [nestin (E: green), vWF (E: red), and DAPI (E: blue)]. Nestin<sup>+</sup> cells expressed NG2 [nestin (F, G: red), NG2 (F, H: green), and DAPI (F-H: blue)]. Scale bars = 50 μm (B-F). CT, computed tomography; H&E, hematoxylin and eosin.
