# Supplementary material for: Identification of Multipotent Stem Cells in Human Brain Tissue Following Stroke
Source: PubMed Central journal article supplement — Stem Cells Dev. 2017 Jun 1;26(11):787–97. doi: 10.1089/scd.2016.0334 (PMC5466056; doi:10.1089/scd.2016.0334), 2017-06-01
Supplement: Supp_Figure2.pdf [file Supp_Figure2.pdf]

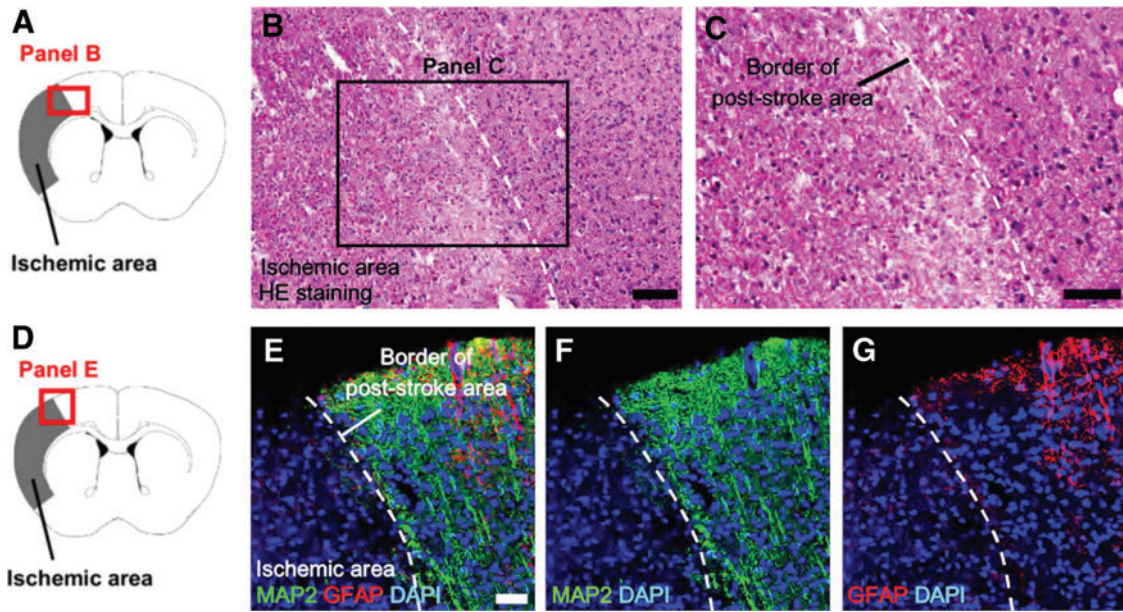

**SUPPLEMENTARY FIG. S2.** Histological changes in mouse brain following ischemic stroke. H&E staining (**A**) showed that cells within the ischemic areas underwent nuclear pyknotic changes (**B, C**). Immunohistochemistry (**D**) showed few healthy mature neural cells, such as neurons [MAP2 (**E, F**: *green*) and DAPI (**E, F**: *blue*)] and astrocytes [GFAP (**E, G**: *green*) and DAPI (**E, G**: *blue*)] within the ischemic area, while these cells were observed within nonischemic areas. Scale bars = 100  $\mu\text{m}$  (**B**) and 50  $\mu\text{m}$  (**C, E**).
