# Supplementary material for: Identification of Multipotent Stem Cells in Human Brain Tissue Following Stroke
Source: PubMed Central journal article supplement — Stem Cells Dev. 2017 Jun 1;26(11):787–97. doi: 10.1089/scd.2016.0334 (PMC5466056; doi:10.1089/scd.2016.0334), 2017-06-01
Supplement: Supp_Figure3.pdf [file Supp_Figure3.pdf]

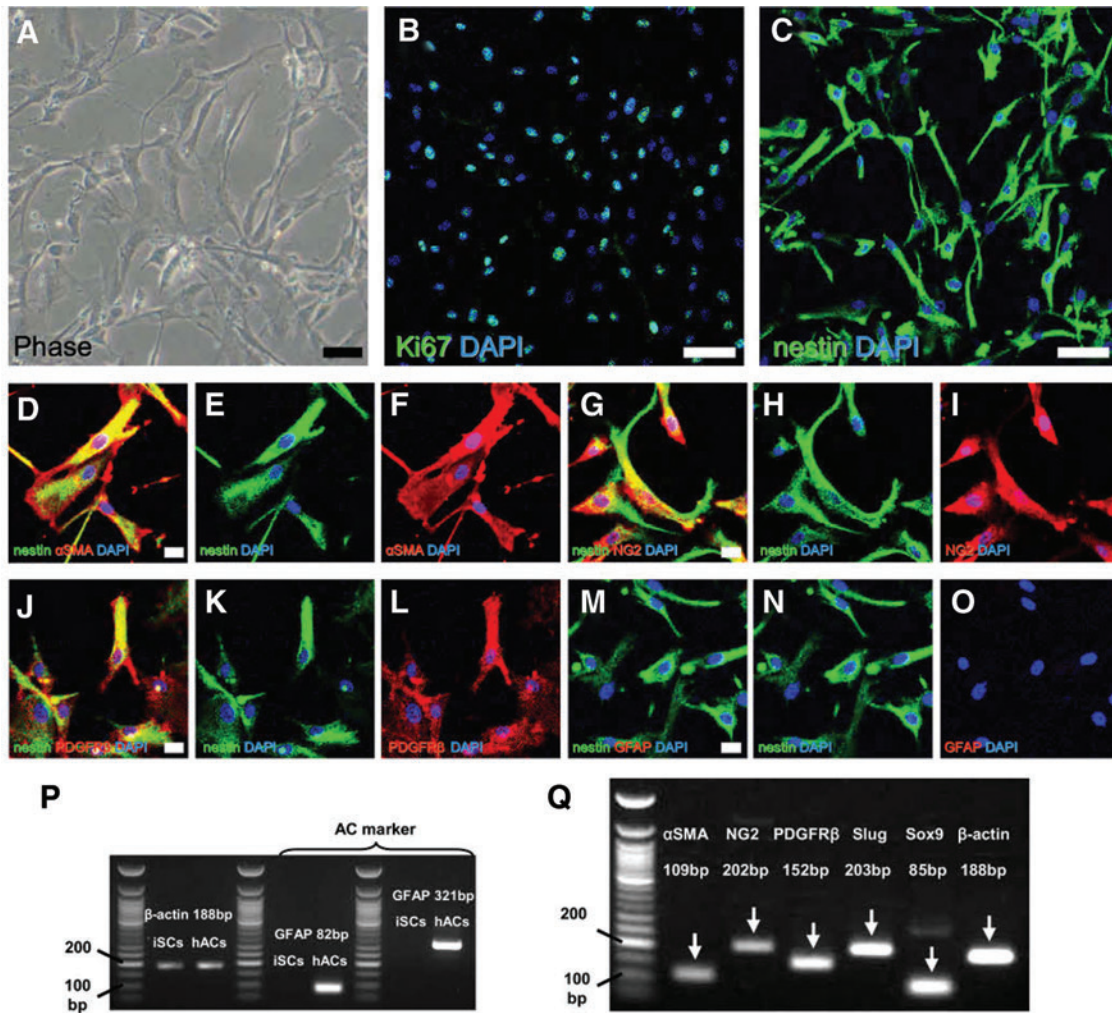

**SUPPLEMENTARY FIG. S3.** Isolation and characterization of human iSCs obtained from the second patient. Putative iSCs (A) widely expressed Ki67 [Ki67 (B: green) and DAPI (B: blue)] and nestin [nestin (C: green) and DAPI (C: blue)]. In addition, these nestin<sup>+</sup> cells expressed  $\alpha$ SMA [nestin (D, E: green),  $\alpha$ SMA (D, F: red), and DAPI (D-F: blue)], NG2 [nestin (G, H: green), NG2 (G, I: red), and DAPI (G-I: blue)], and PDGFR $\beta$  [nestin (J, K: green), PDGFR $\beta$  (J, L: red), and DAPI (J-L: blue)], but not GFAP [nestin (M, N: green), GFAP (M, O: red), and DAPI (M-O: blue)]. By PCR, putative iSCs did not express astrocytic markers (P), but did express pericytic and neural crest markers (Q). Scale bars = 50  $\mu$ m (A), 100  $\mu$ m (B, C), and 20  $\mu$ m (D, G, J, M).  $\alpha$ SMA, alpha smooth muscle actin; iSC, ischemia-induced multipotent stem cells.
