# Supplementary material for: Identification of Multipotent Stem Cells in Human Brain Tissue Following Stroke
Source: PubMed Central journal article supplement — Stem Cells Dev. 2017 Jun 1;26(11):787–97. doi: 10.1089/scd.2016.0334 (PMC5466056; doi:10.1089/scd.2016.0334), 2017-06-01
Supplement: Supp_Figure4.pdf [file Supp_Figure4.pdf]

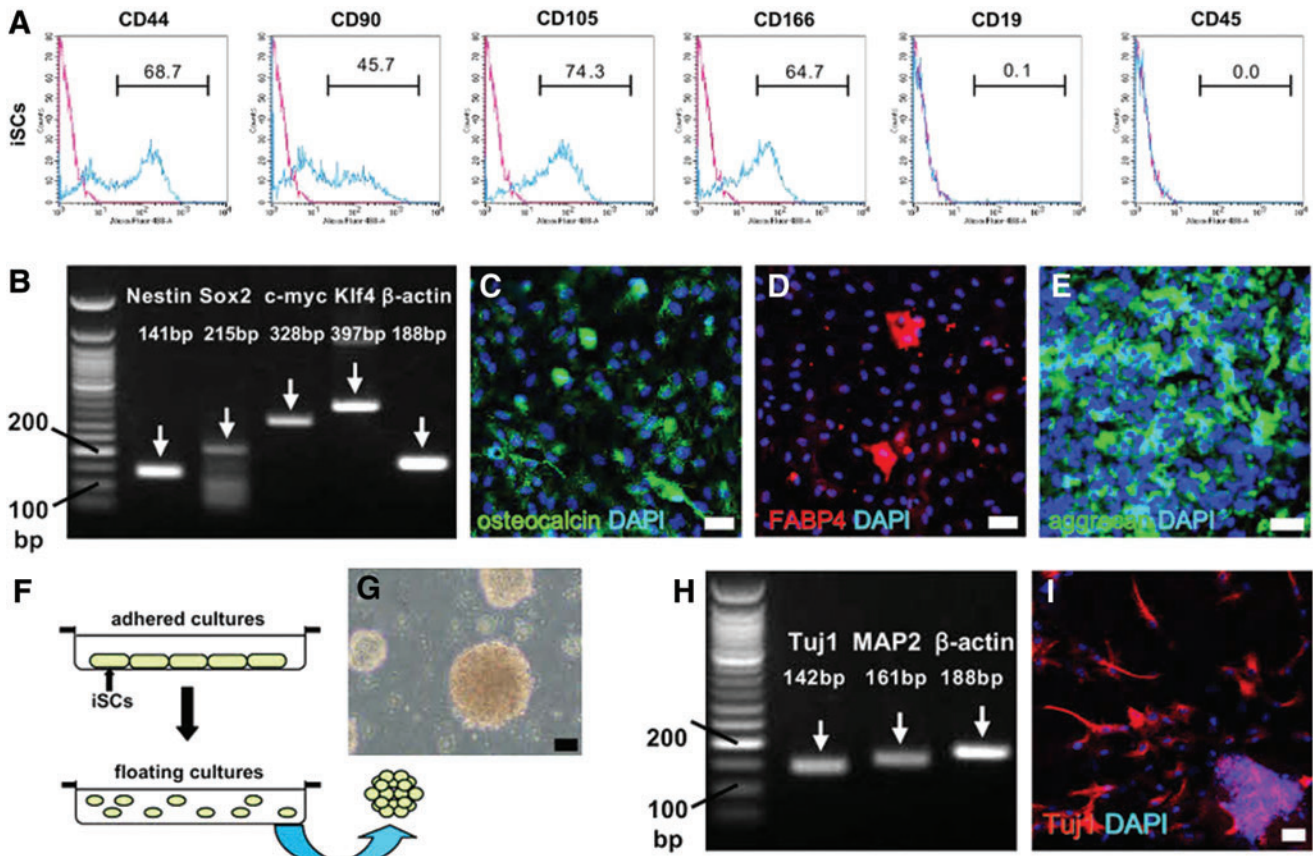

**SUPPLEMENTARY FIG. S4.** Multipotent stem cell activity of human iSCs obtained from the second patient. Putative human iSCs expressed multiple MSC markers as revealed by FACS (A). PCR analysis confirmed that iSCs expressed various stem cell markers (B). iSCs differentiated into multilineage cells, including osteocalcin<sup>+</sup> osteoblasts [osteocalcin (C: green) and DAPI (C: blue)], FABP4<sup>+</sup> adipocytes [FABP4 (D: red) and DAPI (D: blue)], and aggrecan<sup>+</sup> chondrocytes [aggrecan (E: green) and DAPI (E: blue)]. iSCs formed neurosphere-like cell clusters in suspended culture (F, G). PCR analysis confirmed that they expressed neuronal genes (H). Immunohistochemical analysis showed that the cell clusters differentiated into TuJ1<sup>+</sup> neuronal cells [TuJ1 (I: red) and DAPI (I: red)]. Scale bars=50 $\mu$ m (C–E, G, I). FACS, fluorescence-activated cell sorting; MSC, mesenchymal stem cell.
